# Supplementary material
Source: publisher site journal article supplement (https://static.cambridge.org/content/id/urn:cambridge.org:id:article:S1368980020001500/resource/name/S1368980020001500supp001.docx)
Supplement: Supplementary file 1 [file S1368980020001500supp001.docx]

**Supplemental Table S1.**Themes and subthemes from the systematic review and corresponding questionnaire items.

| *Theme* | *Subtheme* | *Survey question(s)* |
| --- | --- | --- |
| Beliefs about effectiveness and cost-effectiveness | Impact on SSB purchases and consumption | “Ik denk dat een belasting op dranken met suiker ervoor zal zorgen dat mensen minder dranken met suiker drinken.” (*I believe that an SSB tax would reduce people’s SSB consumption.*)  “Ik denk dat een belasting op dranken met suiker ervoor zal zorgendat ik minder dranken met suiker drink.” (*I believe that an SSB tax would reduce my SSB consumption.*) |
|  | Impact on health-related outcomes | “Ik denk dat een belasting op dranken met suiker zal bijdragen aan het verbeteren van de gezondheid van mensen.” (*I believe that an SSB tax will contribute to improving people’s health.*)  “Ik denk dat een belasting op dranken met suiker zal bijdragen aan het verbeteren van mijn gezondheid.” (*I believe that an SSB tax will contribute to improving my health.*) |
|  | Impact on SSB prices | “Ik denk dat een belasting op dranken met suiker betaald zal worden door fabrikanten, zodat dranken met suiker voor de consument niet duurder zullen worden.” (*I believe that an SSB tax will be paid by producers, wherefore SSB will not be more expensive for consumers.*)  “Ik denk dat een belasting op dranken met suiker betaald zal worden door consumenten, doordat dranken met suiker duurder zullen worden.” (*I believe that an SSB tax will be paid by consumers, because SSB will be more expensive.*) |
|  | Availability of healthy alternatives | “Ik denk dat dranken met suikerschadelijker zijn voor de gezondheid dan dranken zonder suiker met zoetstoffen.” (*I believe that SSB are more detrimental for health than artificially sweetened beverages.*) |
|  | Encourage industry to reformulate content | “Ik denk dat een belasting op dranken met suiker fabrikanten zal aanmoedigen suiker in dranken te verminderen.” (*I believe that an SSB tax will encourage producers to reduce sugar in beverages*.) |
|  | Cost-effectiveness | “Ik denk dat een belasting op dranken met suiker gezondheidszorgkosten zal besparen in de toekomst.” (*I believe that an SSB tax will save healthcare costs in the future.*) |
| Beliefs about appropriateness | Taxation as an intervention strategy | “Ik denk dat een belasting op dranken met suiker individuele vrijheid beperkt.” (*I believe that an SSB tax limits individual freedom.*) |
|  | SSB as an intervention target | “Ik denk dat dranken met suikerbijdragen aan het ontwikkelen van overgewicht.” (*I believe that SSB consumption contributes to the development of overweight.*)  “Ik denk dat dranken met suikerduurder moeten zijn dan dranken zonder suiker.” (*I believe that SSB should be more expensive than beverages without sugar.*) |
|  | Beliefs about overweight and obesity | “Ik vind overgewicht een probleem in Nederland.” (*I believe that overweight is a problem in the Netherlands.*)  “Ik vind overgewicht de verantwoordelijkheid van de overheid.” (*I believethatoverweight is theresponsibility of thegovernment.*) |
| *Theme* | *Subtheme* | *Survey question(s)* |
|  |  | “Ik vind overgewicht de verantwoordelijkheid van mensen zelf.” (*I believe that overweight is the responsibility of people themselves.*)  “Ik vind overgewicht de verantwoordelijkheid van fabrikanten van dranken met suiker.” (*I believe that overweight is the responsibility of SSB producers.*) |
| Beliefs about economic and socioeconomic benefit | Raise revenue for societal health programs | “Ik vind dat geld dat zal worden opgehaald met een belasting op dranken met suiker moet worden gebruikt in maatschappelijke programma’s om gezondheid te verbeteren (bijvoorbeeld gezondheidsvoorlichting).” (*I believe that raised revenue from an SSB tax should be used for societal health programs (e.g. health education).*) |
|  | Raise revenue for health care | “Ik vind dat geld dat zal worden opgehaald met een belasting op dranken met suiker moet worden gebruikt in de gezondheidszorg.” (*I believe that raised revenue from an SSB tax should be used for health care.*) |
|  | Raise revenue for the general budget | “Ik vind dat geld dat zal worden opgehaald met een belasting op dranken met suiker moet worden verdeeld over alle ministeries (Rijksbegroting).” (*I believe that raised revenue from an SSB tax should be used for the general state budget.*) |
|  | Negative economic impact | “Ik denk dat een belasting op dranken met suiker negatieve gevolgen heeft voor de economie.” (*I believe that an SSB tax has a negative economic impact.*) |
|  | Impact on socioeconomic equality | “Ik denk dat een belasting op dranken met suiker niet eerlijk is voor mensen met een lager inkomen.” (*I believe that an SSB tax is not fair for those with a low income.*) |
| Beliefs about policy adoption and implementation | Feasibility | “Ik denk dat een belasting op dranken met suiker haalbaar is om in te voeren in Nederland.” (*I believe that an SSB tax is feasible to implement in the Netherlands.*) |
| Mistrust | Mistrust of industry | “Ik heb vertrouwen dat fabrikanten van dranken met suiker geven om de gezondheid van mensen.”(*I trust that SSB producers care about people’s health.*) |
|  | Mistrust of government | “Ik heb vertrouwen dat de overheid een belasting op dranken met suiker ziet als een manier om de gezondheid van mensen te verbeteren.” (*I trust that the government views an SSB tax as a strategy to improve people’s health.*) |
|  | Mistrust of public health experts | “Ik heb vertrouwen dat experts in gezondheid betrouwbare informatie geven over de risico’s van dranken met suiker voor de gezondheid (bijvoorbeeld wetenschappers en artsen).” (*I trust that public health experts give reliable information about the health risks of SSB (e.g. scientists and physicians).*) |
